# Supplementary material for: Molecular characterization of extended spectrum cephalosporin resistant Escherichia coli isolated from livestock and in-contact humans in Southeast Nigeria
Source: Front Microbiol. 2022 Jul 22;13:937968. doi: 10.3389/fmicb.2022.937968 (PMC9354541; doi:10.3389/fmicb.2022.937968)
Supplement: Supplementary file 1 [file Table_4.xlsx]

## Sheet: Sheet1
Supplementary Table 4: Pairwise SNPs Distance of E. coli (n=140) isolated from Livestock and in-contact Humans in Southeast Nigeria.
snp-dists 0.2	AAB015	AAB016	AAB025	AAB028	AAB050	AAB054	AAB055	AAB058	AAB060	AAB069	AAB070	AAB081	AAB082	AAB096	AAB101	AAB110	AAB114	AAB118	AAB120	AAB121	AAB123	AAB124	AAB125	AAB126	AAB127	AAB128	AAB129	AAB140	AB102	AEB005-star	AEB007-star	AEB008	AEB010	AEB020	AEB022	AEB025	AEB028	AEB029	AEB032	AEB033	AEB035	AEB039	AEB040	AEB041	AEB042	AEB043	AEB044	AEB045	AEB048
AAB015	0	959	127990	128952	126669	117395	117393	23200	124245	122799	123151	115307	112970	122158	123384	115650	110247	122380	122388	108765	123488	122538	124017	124590	118657	22482	122389	123550	114851	116132	116962	113860	116293	113851	119532	117286	113894	116362	75025	116408	75217	116384	116345	116424	116342	117100	116796	116417	116368
AAB016	959	0	127869	128914	126566	117315	117309	22937	124108	122674	122979	115280	112902	122034	123253	115571	110242	122246	122265	108679	123341	122379	123964	124550	118570	22327	122263	123533	114717	116004	116882	113802	116164	113819	119515	117215	113807	116301	74938	116339	75199	116321	116308	116344	116279	117060	116762	116316	116299
AAB025	127990	127869	0	91025	7708	100648	100670	134861	20669	17687	18563	108176	101846	16994	18752	98696	119197	16103	16107	107085	18798	16689	95960	96816	87338	134696	16234	92936	107416	65268	96898	103581	65377	103565	100035	97305	103508	96778	144462	96745	144562	96788	96775	96746	96799	97763	96794	96732	96775
AAB028	128952	128914	91025	0	91706	65576	65569	130172	96816	95144	95653	76856	67661	95209	95721	64659	126035	94946	94948	86860	96352	95269	21125	22996	103025	130030	94952	12587	75668	94843	69416	68174	94956	68226	72883	69482	68173	68763	135350	68731	135518	68743	68743	68759	68756	69975	69088	68747	68759
AAB050	126669	126566	7708	91706	0	100991	101001	135074	22342	19637	20408	109007	103117	18190	20583	99696	117904	18125	18122	108201	20608	18661	96661	97428	86357	134941	18242	93510	108287	66324	98355	104801	66476	104807	101332	98696	104749	98277	145674	98247	145806	98286	98276	98254	98307	99255	98276	98242	98269
AAB054	117395	117315	100648	65576	100991	0	276	113071	98490	96506	96965	51764	45330	96657	97278	10140	119877	96241	96228	61320	97767	96608	58115	59768	90030	112997	96328	60265	50411	89571	39489	44907	89746	44989	44638	40183	44912	37952	118899	37906	119167	37946	37969	37851	37989	39595	38728	37862	37923
AAB055	117393	117309	100670	65569	101001	276	0	113072	98487	96517	96981	51727	45341	96668	97293	10137	119887	96252	96236	61297	97764	96600	58084	59742	90046	113015	96344	60262	50408	89585	39444	44934	89764	44996	44598	40156	44887	37921	118896	37871	119141	37898	37911	37901	37956	39532	38699	37876	37890
AAB058	23200	22937	134861	130172	135074	113071	113072	0	129969	128741	128594	108559	110905	128344	129248	113204	111066	127935	127946	100829	128638	127630	124682	125185	117142	1538	128030	126310	108213	118579	118145	110866	118739	110783	120601	118216	110822	116919	62782	116918	63240	116917	116884	116904	116876	117518	117320	116901	116907
AAB060	124245	124108	20669	96816	22342	98490	98487	129969	0	3868	4122	102725	97578	6857	4733	96156	118854	6396	6409	102246	7785	6153	95838	96178	90005	130204	6517	94989	102615	59384	93999	99310	59502	99296	95969	94001	99285	94048	138621	94021	138756	94060	94020	94026	94057	94488	94274	94009	94036
AAB069	122799	122674	17687	95144	19637	96506	96517	128741	3868	0	1312	101321	95308	3104	1538	94112	117985	2628	2625	99697	5518	3324	94220	95108	87787	128666	2747	93353	100589	56479	92178	97035	56671	97056	95174	92557	96997	92200	137087	92175	137176	92209	92198	92162	92234	93103	92480	92146	92183
AAB070	123151	122979	18563	95653	20408	96965	96981	128594	4122	1312	0	101365	95848	4286	2423	94604	117872	3806	3803	100319	5496	3690	94437	95041	88460	128922	3927	93702	100979	57546	92581	97447	57722	97479	95022	92648	97456	92590	137166	92580	137343	92603	92581	92569	92620	93236	92861	92556	92586
AAB081	115307	115280	108176	76856	109007	51764	51727	108559	102725	101321	101365	0	47070	101544	102019	54739	126731	100811	100796	56900	101761	100478	67557	67765	90305	108813	100886	74088	2309	92256	60524	45339	92439	45261	63671	60609	45350	59380	110465	59384	110701	59332	59282	59396	59338	59895	59999	59366	59355
AAB082	112970	112902	101846	67661	103117	45330	45341	110905	97578	95308	95848	47070	0	95109	96103	42997	123186	94394	94381	56242	96201	94744	57513	59398	89357	110771	94497	62961	45628	89314	51452	4369	89512	4446	56690	52143	4325	50256	111912	50216	112176	50295	50269	50190	50313	51898	51050	50172	50234
AAB096	122158	122034	16994	95209	18190	96657	96668	128344	6857	3104	4286	101544	95109	0	4572	94198	118580	1389	1377	99124	4533	2141	94238	95164	86696	128186	1499	93447	100755	56414	91902	96552	56615	96534	95213	92302	96483	91815	137334	91784	137452	91814	91806	91769	91841	92850	92095	91764	91796
AAB101	123384	123253	18752	95721	20583	97278	97293	129248	4733	1538	2423	102019	96103	4572	0	94913	118382	4101	4100	100579	6300	4463	94779	95598	88642	129272	4218	93924	101337	57626	92870	97803	57715	97841	95714	93148	97785	92890	137664	92860	137801	92896	92859	92865	92905	93742	93157	92853	92882
AAB110	115650	115571	98696	64659	99696	10140	10137	113204	96156	94112	94604	54739	42997	94198	94913	0	119772	93775	93766	62596	95335	94153	57054	58784	90945	113160	93867	58156	53484	88320	37057	45159	88507	45240	42021	37639	45139	36119	119980	36057	120204	36065	36084	36137	36128	37602	36842	36093	36067
AAB114	110247	110242	119197	126035	117904	119877	119887	111066	118854	117985	117872	126731	123186	118580	118382	119772	0	118217	118237	122610	118763	118081	124463	124707	121811	111181	118312	121698	126499	120437	120803	123659	120520	123684	122094	120591	123682	120827	119933	120816	120175	120809	120775	120824	120783	121082	121026	120813	120806
AAB118	122380	122246	16103	94946	18125	96241	96252	127935	6396	2628	3806	100811	94394	1389	4101	93775	118217	0	80	98583	3238	852	93867	94781	86643	127760	202	93044	99976	55580	91374	95856	55765	95840	94709	91790	95778	91268	136714	91244	136823	91278	91274	91226	91305	92338	91554	91216	91258
AAB120	122388	122265	16107	94948	18122	96228	96236	127946	6409	2625	3803	100796	94381	1377	4100	93766	118237	80	0	98600	3271	816	93859	94779	86641	127766	176	93039	99964	55583	91368	95842	55770	95830	94723	91786	95777	91272	136723	91243	136834	91284	91271	91223	91310	92338	91557	91223	91258
AAB121	108765	108679	107085	86860	108201	61320	61297	100829	102246	99697	100319	56900	56242	99124	100579	62596	122610	98583	98600	0	100648	98930	78504	80159	84445	100634	98726	83326	55368	87882	71851	54527	88120	54578	76857	72488	54445	70071	104703	70027	104976	70035	70051	70101	70052	71639	70745	70059	70012
AAB123	123488	123341	18798	96352	20608	97767	97764	128638	7785	5518	5496	101761	96201	4533	6300	95335	118763	3238	3271	100648	0	3036	95059	95548	88514	128986	3374	94312	101517	57898	93012	97696	58011	97725	95208	92973	97705	92922	137800	92899	138004	92928	92930	92915	92923	93505	93182	92903	92916
AAB124	122538	122379	16689	95269	18661	96608	96600	127630	6153	3324	3690	100478	94744	2141	4463	94153	118081	852	816	98930	3036	0	93876	94424	86988	127848	960	93312	100079	56148	91692	96153	56344	96112	94505	91776	96090	91611	136661	91591	136852	91626	91601	91560	91628	92418	91863	91559	91592
AAB125	124017	123964	95960	21125	96661	58115	58084	124682	95838	94220	94437	67557	57513	94238	94779	57054	124463	93867	93859	78504	95059	93876	0	2553	100505	124764	93930	17424	66676	92380	62428	57575	92529	57573	66444	62453	57587	61917	129071	61867	129241	61859	61858	61874	61877	63042	62358	61872	61860
AAB126	124590	124550	96816	22996	97428	59768	59742	125185	96178	95108	95041	67765	59398	95164	95598	58784	124707	94781	94779	80159	95548	94424	2553	0	101396	125490	94823	19206	68020	93309	64060	59460	93487	59418	66100	63765	59477	63526	129764	63497	129915	63458	63404	63538	63467	63811	63978	63504	63504
AAB127	118657	118570	87338	103025	86357	90030	90046	117142	90005	87787	88460	90305	89357	86696	88642	90945	121811	86643	86641	84445	88514	86988	100505	101396	0	117040	86746	102745	89472	85117	96869	88894	85296	88872	99926	97297	88820	95884	121276	95862	121455	95893	95854	95840	95871	96817	96162	95842	95871
AAB128	22482	22327	134696	130030	134941	112997	113015	1538	130204	128666	128922	108813	110771	128186	129272	113160	111181	127760	127766	100634	128986	127848	124764	125490	117040	0	127849	126239	108138	118468	117977	110669	118635	110648	120819	118322	110668	116749	62559	116735	62899	116756	116713	116756	116719	117583	117167	116734	116759
AAB129	122389	122263	16234	94952	18242	96328	96344	128030	6517	2747	3927	100886	94497	1499	4218	93867	118312	202	176	98726	3374	960	93930	94823	86746	127849	0	93040	100070	55702	91488	95955	55892	95939	94814	91901	95894	91382	136784	91356	136893	91400	91388	91347	91425	92449	91669	91337	91376
AAB140	123550	123533	92936	12587	93510	60265	60262	126310	94989	93353	93702	74088	62961	93447	93924	58156	121698	93044	93039	83326	94312	93312	17424	19206	102745	126239	93040	0	73090	90682	64894	64449	90818	64504	68134	64835	64515	63540	134231	63509	134380	63548	63500	63579	63507	64586	63866	63555	63531
AB102	114851	114717	107416	75668	108287	50411	50408	108213	102615	100589	100979	2309	45628	100755	101337	53484	126499	99976	99964	55368	101517	100079	66676	68020	89472	108138	100070	73090	0	91308	59333	43975	91498	44025	63976	59925	43910	58176	109812	58150	110124	58214	58137	58195	58177	59554	58921	58162	58175
AEB005-star	116132	116004	65268	94843	66324	89571	89585	118579	59384	56479	57546	92256	89314	56414	57626	88320	120437	55580	55583	87882	57898	56148	92380	93309	85117	118468	55702	90682	91308	0	90724	91325	698	91329	94321	91159	91290	89411	125212	89388	125308	89416	89398	89372	89424	90612	90101	89381	89411
AEB007-star	116962	116882	96898	69416	98355	39489	39444	118145	93999	92178	92581	60524	51452	91902	92870	37057	120803	91374	91368	71851	93012	91692	62428	64060	96869	117977	91488	64894	59333	90724	0	51989	90895	52023	6869	1094	51917	8793	125160	8759	125402	8810	8819	8724	8826	10864	9620	8715	8747
AEB008	113860	113802	103581	68174	104801	44907	44934	110866	99310	97035	97447	45339	4369	96552	97803	45159	123659	95856	95842	54527	97696	96153	57575	59460	88894	110669	95955	64449	43975	91325	51989	0	91524	527	57329	52612	451	50767	110771	50745	111056	50761	50772	50709	50780	52455	51533	50723	50772
AEB010	116293	116164	65377	94956	66476	89746	89764	118739	59502	56671	57722	92439	89512	56615	57715	88507	120520	55765	55770	88120	58011	56344	92529	93487	85296	118635	55892	90818	91498	698	90895	91524	0	91536	94466	91317	91493	89582	125418	89572	125522	89593	89573	89553	89598	90775	90256	89556	89590
AEB020	113851	113819	103565	68226	104807	44989	44996	110783	99296	97056	97479	45261	4446	96534	97841	45240	123684	95840	95830	54578	97725	96112	57573	59418	88872	110648	95939	64504	44025	91329	52023	527	91536	0	57339	52560	485	50832	110758	50810	111051	50827	50802	50779	50824	52459	51574	50767	50812
AEB022	119532	119515	100035	72883	101332	44638	44598	120601	95969	95174	95022	63671	56690	95213	95714	42021	122094	94709	94723	76857	95208	94505	66444	66100	99926	120819	94814	68134	63976	94321	6869	57329	94466	57339	0	6160	57360	14439	127849	14401	127956	14333	14395	14592	14338	13539	14958	14529	14447
AEB025	117286	117215	97305	69482	98696	40183	40156	118216	94001	92557	92648	60609	52143	92302	93148	37639	120591	91790	91786	72488	92973	91776	62453	63765	97297	118322	91901	64835	59925	91159	1094	52612	91317	52560	6160	0	52557	9049	125444	8972	125733	8953	8965	9021	8983	10608	9725	8984	8983
AEB028	113894	113807	103508	68173	104749	44912	44887	110822	99285	96997	97456	45350	4325	96483	97785	45139	123682	95778	95777	54445	97705	96090	57587	59477	88820	110668	95894	64515	43910	91290	51917	451	91493	485	57360	52557	0	50720	110767	50685	111072	50729	50707	50665	50750	52461	51500	50643	50699
AEB029	116362	116301	96778	68763	98277	37952	37921	116919	94048	92200	92590	59380	50256	91815	92890	36119	120827	91268	91272	70071	92922	91611	61917	63526	95884	116749	91382	63540	58176	89411	8793	50767	89582	50832	14439	9049	50720	0	124227	313	124260	343	433	329	342	2537	1239	295	319
AEB032	75025	74938	144462	135350	145674	118899	118896	62782	138621	137087	137166	110465	111912	137334	137664	119980	119933	136714	136723	104703	137800	136661	129071	129764	121276	62559	136784	134231	109812	125212	125160	110771	125418	110758	127849	125444	110767	124227	0	124220	1497	124227	124257	124274	124220	124952	124545	124246	124246
AEB033	116408	116339	96745	68731	98247	37906	37871	116918	94021	92175	92580	59384	50216	91784	92860	36057	120816	91244	91243	70027	92899	91591	61867	63497	95862	116735	91356	63509	58150	89388	8759	50745	89572	50810	14401	8972	50685	313	124220	0	124271	287	362	352	323	2467	1178	286	285
AEB035	75217	75199	144562	135518	145806	119167	119141	63240	138756	137176	137343	110701	112176	137452	137801	120204	120175	136823	136834	104976	138004	136852	129241	129915	121455	62899	136893	134380	110124	125308	125402	111056	125522	111051	127956	125733	111072	124260	1497	124271	0	124270	124291	124333	124235	124961	124576	124290	124302
AEB039	116384	116321	96788	68743	98286	37946	37898	116917	94060	92209	92603	59332	50295	91814	92896	36065	120809	91278	91284	70035	92928	91626	61859	63458	95893	116756	91400	63548	58214	89416	8810	50761	89593	50827	14333	8953	50729	343	124227	287	124270	0	354	367	334	2414	1151	320	307
AEB040	116345	116308	96775	68743	98276	37969	37911	116884	94020	92198	92581	59282	50269	91806	92859	36084	120775	91274	91271	70051	92930	91601	61858	63404	95854	116713	91388	63500	58137	89398	8819	50772	89573	50802	14395	8965	50707	433	124257	362	124291	354	0	421	381	2464	1199	378	348
AEB041	116424	116344	96746	68759	98254	37851	37901	116904	94026	92162	92569	59396	50190	91769	92865	36137	120824	91226	91223	70101	92915	91560	61874	63538	95840	116756	91347	63579	58195	89372	8724	50709	89553	50779	14592	9021	50665	329	124274	352	124333	367	421	0	399	2605	1284	187	320
AEB042	116342	116279	96799	68756	98307	37989	37956	116876	94057	92234	92620	59338	50313	91841	92905	36128	120783	91305	91310	70052	92923	91628	61877	63467	95871	116719	91425	63507	58177	89424	8826	50780	89598	50824	14338	8983	50750	342	124220	323	124235	334	381	399	0	2401	1163	354	314
AEB043	117100	117060	97763	69975	99255	39595	39532	117518	94488	93103	93236	59895	51898	92850	93742	37602	121082	92338	92338	71639	93505	92418	63042	63811	96817	117583	92449	64586	59554	90612	10864	52455	90775	52459	13539	10608	52461	2537	124952	2467	124961	2414	2464	2605	2401	0	3191	2555	2481
AEB044	116796	116762	96794	69088	98276	38728	38699	117320	94274	92480	92861	59999	51050	92095	93157	36842	121026	91554	91557	70745	93182	91863	62358	63978	96162	117167	91669	63866	58921	90101	9620	51533	90256	51574	14958	9725	51500	1239	124545	1178	124576	1151	1199	1284	1163	3191	0	1245	1191
AEB045	116417	116316	96732	68747	98242	37862	37876	116901	94009	92146	92556	59366	50172	91764	92853	36093	120813	91216	91223	70059	92903	91559	61872	63504	95842	116734	91337	63555	58162	89381	8715	50723	89556	50767	14529	8984	50643	295	124246	286	124290	320	378	187	354	2555	1245	0	267
AEB048	116368	116299	96775	68759	98269	37923	37890	116907	94036	92183	92586	59355	50234	91796	92882	36067	120806	91258	91258	70012	92916	91592	61860	63504	95871	116759	91376	63531	58175	89411	8747	50772	89590	50812	14447	8983	50699	319	124246	285	124302	307	348	320	314	2481	1191	267	0
AEB061	116589	116429	66183	95482	67105	90415	90413	118532	59356	57593	57846	92156	90238	57534	58442	89157	120494	56690	56687	88761	57987	56205	92733	92986	86007	118842	56782	91249	91946	1830	91498	92175	2197	92147	94115	91464	92145	90180	125458	90153	125636	90173	90143	90134	90183	90796	90815	90139	90168
AEB066	116051	115976	99726	61942	101372	36812	36782	112813	97637	95394	96040	50407	41812	94841	96205	38744	122126	94521	94533	61211	96416	94981	53433	55365	91438	112657	94637	58910	48906	89902	45355	40516	90082	40557	50720	46128	40436	44066	115847	44048	116061	44049	44113	44112	44073	45823	44865	44062	44016
AEB068	114183	114068	105228	74963	106330	50058	50113	106906	101014	98767	99329	23279	45053	98771	99566	52570	124588	98047	98023	53014	99798	98321	66475	68056	88349	106728	98131	71761	21602	90537	58012	43837	90717	43927	63036	58763	43828	57211	110330	57194	110632	57249	57264	57149	57259	58790	57923	57155	57236
AEB070	117466	117345	64689	94762	66188	90975	90991	118608	58357	55461	56306	90787	89529	56017	56597	89584	120876	55215	55202	86937	57417	55655	92809	93794	84857	118646	55325	93474	89895	7582	90288	91512	7972	91527	94031	90728	91457	89317	124498	89307	124628	89315	89281	89254	89331	90459	89994	89265	89290
AEB071	116040	116019	99670	62144	101293	37154	37112	112708	97555	95412	96031	50254	42051	94792	96181	38906	122191	94472	94471	61277	96335	94866	53627	55454	91428	112566	94570	59055	49001	90116	45542	40705	90276	40746	50691	46171	40653	44261	115733	44212	115914	44202	44196	44330	44214	45872	44912	44294	44246
AEB073	116053	115950	99651	62031	101257	36857	36858	112693	97616	95362	96015	50394	41835	94738	96181	38690	122166	94390	94396	61193	96256	94854	53624	55580	91383	112497	94496	58922	48874	90011	45372	40531	90161	40579	50778	46138	40467	44082	115669	44055	115909	44059	44133	44100	44116	45857	44872	44044	44049
AEB080	115605	115538	89341	63969	90297	53304	53315	117673	88734	86998	87400	62876	55554	86525	87603	52029	118049	86364	86362	73307	87803	86598	57585	58768	96805	117523	86373	56756	61863	87944	58285	57320	88089	57320	62026	58785	57265	56072	128297	56005	128595	56053	55997	56058	56068	57343	56606	56028	56046
AEB083	115641	115552	89318	63933	90271	53268	53290	117688	88708	86968	87374	62900	55485	86489	87570	52014	118062	86337	86332	73305	87792	86567	57554	58795	96787	117528	86340	56753	61852	87919	58211	57249	88069	57262	62041	58748	57167	55998	128299	55964	128599	56022	55972	55987	56033	57331	56593	55941	56004
AEB085	115672	115591	89449	64177	90415	53606	53586	117657	88667	87152	87365	62751	55865	86684	87670	52286	118080	86536	86532	73533	87746	86583	57635	58689	96944	117570	86542	56976	62012	88106	58506	57569	88253	57543	61955	58821	57499	56273	128313	56205	128580	56199	56199	56299	56216	57384	56726	56262	56250
AEB088	117281	117153	89019	102269	90731	88535	88549	114887	79642	77065	77631	79472	79956	76953	77964	87770	126895	76490	76491	79304	78355	76777	93013	93925	79873	114978	76599	98830	78518	62761	91772	80029	62988	80032	95068	92239	79986	91099	115112	91118	115190	91101	91087	91065	91093	92047	91620	91053	91090
AEB091	124789	124830	104935	73007	106390	53955	53917	123319	103268	102541	102787	66782	58017	102455	102438	52276	127540	101705	101732	76785	102147	101892	65533	66706	101739	123177	101805	68253	66101	98225	54906	58493	98241	58545	58246	55195	58516	54059	127991	54063	128036	54031	54013	54229	53991	54989	54634	54175	54086
AEB092	116522	116408	64767	94270	65140	89630	89648	118388	58586	55505	56619	90402	88814	55036	56717	88277	121652	54648	54650	86408	57094	55232	92443	93473	83431	118292	54762	93103	89353	6460	88968	90840	6892	90848	92792	89400	90790	87904	124399	87879	124513	87902	87885	87854	87929	89101	88592	87863	87894
BEB002	117386	117253	64191	94981	65695	91280	91282	118385	58696	56140	56769	90869	89585	56024	57081	89899	121087	55158	55160	86735	57032	55234	92898	93761	84894	118477	55271	93720	90088	7663	90624	91580	8088	91562	94023	90850	91523	89522	125190	89508	125333	89519	89502	89480	89528	90509	90194	89484	89523
BEB003	117307	117195	63997	94809	65549	91077	91087	118568	58876	55843	56928	91029	89367	55727	57015	89703	121135	54855	54857	86542	57255	55420	92952	93957	84722	118466	54965	93615	90013	7322	90480	91420	7740	91417	94137	90905	91380	89387	125282	89369	125384	89396	89374	89346	89413	90527	90074	89362	89388
BEB004	118226	118079	65962	96081	67296	92516	92524	118953	59492	58110	57951	91087	90995	58094	58959	91246	121516	57252	57263	88363	58010	56658	94022	93856	86484	119441	57369	94691	91382	10094	91932	92938	10447	92918	93604	91891	92940	90829	126056	90826	126247	90841	90816	90787	90831	91039	91425	90791	90832
BEB010	117306	117202	64019	94846	65553	91139	91163	118495	58798	55943	56874	91000	89449	55828	56980	89769	121147	54951	54966	86581	57159	55380	92929	93919	84741	118463	55066	93658	90015	7451	90523	91479	7829	91465	94100	90922	91419	89433	125232	89425	125374	89445	89442	89395	89442	90526	90100	89394	89437
BEB012	125954	125931	95114	8950	95757	60403	60383	127586	97021	95272	95756	71944	61784	95216	95865	59299	124399	94808	94818	81597	96184	95137	13860	15749	101549	127485	94815	4853	70871	93600	65783	62118	93716	62198	69019	65713	62146	64787	132588	64743	132713	64711	64709	64854	64695	65871	65010	64816	64781
BEB013	123241	123109	55497	95630	56646	95657	95662	127392	51561	49039	49813	99085	96547	48675	50073	92531	120282	48222	48208	101189	50334	48762	94712	95551	88743	127253	48256	94516	98312	54239	93912	97808	54508	97826	97251	94447	97772	93413	135642	93382	135653	93416	93373	93362	93417	94418	94079	93367	93377
BEB021	125658	125558	29655	94427	30359	98157	98167	129809	20419	17188	18119	102271	96546	17155	18314	94232	119846	17409	17397	101754	19822	17862	93934	94757	87060	129796	17522	92263	101558	58038	94039	98065	58230	98093	96730	94067	98025	93546	137061	93518	137193	93554	93539	93504	93572	94450	93810	93511	93557
BEB028	23181	23376	135004	130328	135186	113374	113350	3006	130383	128974	129181	109155	111288	128446	129449	113575	111455	128130	128136	100983	129176	128187	125072	125732	117264	2248	128211	126470	108623	118744	118381	111049	118872	111045	121064	118664	111091	117110	63123	117125	63446	117121	117054	117189	117092	117895	117522	117167	117140
BEB030	116053	115973	99725	61009	101253	39016	38984	113546	97367	95334	95805	52412	41585	94895	96076	39688	121188	94496	94487	62939	96168	94693	52819	54687	91264	113444	94587	57415	51155	90574	44348	41118	90743	41096	49449	44840	41030	43347	116772	43284	117050	43239	43281	43313	43252	44891	44008	43288	43291
BEB044	118957	118869	100538	66171	100686	5583	5555	115220	98992	97209	97495	54648	48295	97502	97889	14112	119952	97057	97047	64442	98376	97233	60257	61820	91313	115265	97150	61899	53555	91327	41953	47712	91520	47739	46631	42396	47705	39907	120609	39828	120893	39840	39880	39897	39870	41210	40596	39873	39868
BEB046	114679	114597	106201	75555	107340	49487	49472	107404	101991	99804	100347	23551	44777	99777	100589	51850	124638	99074	99067	52764	100794	99356	66899	68324	88559	107309	99174	72354	22180	91154	57987	43548	91333	43561	62744	58572	43500	57150	109800	57146	110093	57127	57121	57168	57143	58517	57752	57143	57156
BEB048	114771	114681	106326	75660	107438	49695	49691	107454	102047	99961	100392	23774	45006	99933	100668	52024	124592	99239	99227	52933	100811	99444	67049	68490	88641	107397	99323	72407	22397	91308	58180	43731	91489	43769	62731	58620	43745	57307	109825	57314	110099	57311	57341	57419	57291	58584	57914	57366	57334
BEB049	114693	114566	106192	75474	107308	49354	49331	107436	101981	99764	100317	23651	44653	99730	100554	51836	124632	99048	99019	52691	100769	99313	66880	68425	88519	107276	99130	72231	22048	91133	57852	43453	91314	43510	62839	58542	43405	57040	109770	57023	110049	57075	57074	57059	57080	58562	57710	57041	57040
BEB050	124918	124789	41364	95465	42335	95628	95612	126089	31675	29809	29497	97953	93231	29666	30809	92905	120618	29292	29297	98550	30185	28772	93030	93128	84667	126532	29417	93282	97936	54388	93461	94533	54654	94511	95108	93432	94544	93356	132607	93323	132835	93350	93332	93334	93340	93443	93801	93312	93363
BEB051	113427	113337	101201	67117	102376	44450	44433	107987	96718	94477	94961	44041	23350	94516	95283	45227	122557	93832	93822	53465	95455	94142	58080	59809	87984	107896	93948	64225	42847	89566	52477	21825	89733	21890	57204	53042	21825	50838	112518	50775	112668	50755	50767	50808	50806	52196	51536	50807	50769
BEB053	117633	117611	101564	63909	102935	42366	42335	114900	98117	97267	96883	53840	45331	97103	97862	43011	121771	96711	96720	66537	97087	96207	55692	55203	93431	115371	96798	60072	54497	92950	47920	44841	93105	44785	49136	47629	44886	46825	118266	46792	118481	46738	46785	46945	46715	46374	47340	46895	46836
BEB055	114725	114641	102553	69205	103599	46918	46920	109109	97032	95964	95853	45536	26737	96097	96590	47694	123251	95436	95429	56403	96042	95070	60012	60591	89467	109385	95508	66077	45676	91051	54786	25117	91218	25082	57429	54783	25169	53049	113789	53034	113856	53042	53021	53115	52988	53473	53661	53095	53070
BEB057	118971	118887	100410	66069	100602	5331	5369	115336	99008	97081	97526	54846	48102	97379	97841	14066	120005	96925	96914	64364	98426	97274	60306	62017	91246	115277	97022	61854	53571	91224	41780	47634	91424	47658	46857	42487	47609	39746	120656	39686	120920	39739	39753	39634	39800	41324	40539	39620	39724
BEB060	117924	117913	105198	74840	106100	53425	53420	112830	99133	98752	98378	51514	34646	99179	99312	54258	125445	98620	98622	63377	98696	98175	66240	64975	92013	113281	98686	71687	52514	94368	61049	33059	94512	33054	60489	60861	33174	59462	117564	59470	117582	59452	59421	59588	59410	58830	59889	59543	59489
BEB062	113612	113531	101577	67736	102709	45087	45079	107980	96554	94924	95093	43808	24151	94966	95645	45882	122528	94292	94278	54156	95426	94142	58396	59473	88314	108121	94407	64757	43394	89961	52994	22563	90161	22519	56926	53115	22600	51346	112683	51289	112780	51298	51297	51333	51262	52321	52005	51330	51298
BEB064	116114	116015	100433	62073	102053	38488	38475	113731	97922	96548	96613	50414	40507	96439	97193	36469	121852	95721	95724	61978	96779	95481	52486	53385	92769	113940	95818	56779	50265	89382	42648	41493	89555	41398	46515	42620	41448	41651	117195	41616	117493	41583	41594	41619	41564	42536	42281	41601	41598
BEB066	124336	124303	106684	84176	107924	68971	68982	122816	105619	104183	104503	80268	72323	104283	104510	66944	131243	103669	103668	90480	104776	103939	78391	79547	99209	122800	103737	80165	79507	99242	71251	73377	99309	73379	74209	71615	73334	70527	130922	70524	131041	70518	70506	70482	70504	71453	70775	70472	70501
BEB069	121352	121353	112192	85562	113064	63181	63130	115097	106741	106519	106174	37325	59797	106745	106857	65106	129136	106067	106073	67832	105870	105689	77869	77152	95580	115496	106114	82261	38483	99244	69817	58584	99337	58508	69765	69604	58625	68994	118940	68997	118965	68985	68943	69140	68949	68440	69385	69090	68998
BEB074	116499	116369	64830	94368	65171	89671	89682	118220	58407	55697	56506	90302	88883	55175	56685	88329	121692	54808	54794	86437	56894	55041	92383	93355	83556	118229	54908	93196	89396	6562	88998	90864	6968	90858	92694	89292	90809	87931	124406	87915	124566	87936	87920	87893	87945	89067	88619	87907	87915
BEB076	113953	113870	86961	99553	85593	84694	84699	112778	89947	87818	88473	86928	85182	86865	88548	85961	118708	86825	86822	80998	88544	87147	97550	98356	19804	112653	86954	98364	85935	82314	93655	85372	82473	85381	97100	94072	85306	92405	118695	92382	118953	92387	92353	92373	92394	93471	92712	92375	92392
BEB078	118600	118543	113750	86279	115446	65702	65705	113510	109999	108060	108420	58862	56325	107820	108689	67038	131145	107227	107230	60951	108701	107502	76164	77672	88515	113308	107331	82845	57521	94189	72360	54861	94376	54912	77034	73047	54832	71044	112232	71116	112438	71097	71096	71070	71106	72616	71785	71062	71088
BEB079	114602	114513	103824	71481	104531	47882	47872	109042	97870	97171	96700	48093	29491	97206	97833	48793	123823	96584	96582	58013	96835	96125	62213	61700	91276	109520	96676	67057	48659	91854	55618	27712	92035	27665	56155	55455	27783	54058	114835	54042	114901	54050	54031	54107	53980	53349	54602	54094	54059
BEB080	123951	123890	75053	96822	75238	93388	93386	126457	70234	67965	68754	94545	92751	67339	68757	91806	127197	67054	67046	92251	68940	67540	95387	96219	90533	126380	67142	95571	93670	27216	91697	94560	27432	94571	94759	92128	94535	90728	133119	90700	133172	90710	90691	90661	90716	91671	91258	90674	90689
BEB081	116746	116674	88155	64847	89227	55022	55003	118762	87721	86183	86459	64389	57853	85774	86778	54033	117627	85588	85577	75705	86898	85609	58280	59389	97703	118708	85580	57542	63679	88240	59426	59501	88378	59457	62925	59778	59407	56877	129787	56810	130087	56795	56810	56816	56843	57927	57325	56781	56834
BEB082	116577	116511	92541	66403	92038	57518	57535	120752	94409	92690	93222	64879	58877	92005	93288	54945	119851	92061	92067	76423	93633	92403	61028	62662	95327	120586	92194	62429	63661	88441	53199	59504	88607	59471	58098	53921	59431	52677	128437	52667	128484	52687	52726	52643	52722	54280	53033	52593	52656
BEB083	116457	116335	64697	94255	65062	89575	89589	118340	58553	55486	56590	90400	88759	54969	56681	88215	121724	54593	54595	86354	57016	55181	92435	93464	83484	118238	54699	93084	89358	6381	88915	90770	6805	90782	92714	89339	90732	87840	124457	87816	124574	87837	87819	87795	87863	89041	88525	87809	87842
BEB084	116589	116509	92702	66619	92195	57805	57780	120634	94372	92799	93279	64658	59187	92175	93389	55090	119788	92219	92233	76549	93602	92462	61074	62419	95464	120587	92353	62612	63843	88562	53515	59797	88714	59784	57800	53942	59731	53032	128440	52980	128481	52965	52973	53055	52958	54223	53212	52982	52950
BEB086	86277	86201	146177	137452	146957	120455	120446	73840	139850	139109	138750	111831	114133	139270	139602	121176	120168	138889	138890	107014	139261	138418	130756	130695	123247	74357	138972	136073	112166	128945	127145	113154	129069	113065	128425	126968	113179	126044	71372	126054	71646	126020	126026	126088	126014	125972	126419	126054	126071
BEB088	119369	119389	106049	74402	106654	53187	53150	116265	101146	100620	100274	58454	42181	100642	101154	52662	125393	99853	99863	68596	99988	99448	65115	64144	94700	116745	99941	68268	59324	92308	61046	41824	92492	41787	60906	60777	41893	59446	119847	59396	119910	59407	59388	59544	59367	58760	59942	59503	59427
BEB099	122928	122785	17992	95300	19913	96702	96715	128770	3900	498	1466	101423	95529	3539	1599	94322	117985	3075	3076	99915	5537	3493	94297	95161	87974	128788	3198	93488	100729	56763	92362	97217	56916	97247	95209	92650	97165	92390	137172	92357	137298	92388	92359	92360	92394	93235	92654	92342	92365
BEB107	113602	113513	102095	67146	102915	43266	43255	108001	97224	95351	95515	43604	22229	95113	96067	44169	123045	94439	94424	53209	95768	94364	57207	58711	88078	108084	94548	63607	42730	89365	51187	20462	89576	20457	55781	51448	20457	49546	111718	49485	111900	49503	49503	49433	49485	50801	50249	49470	49493
BEB111	116072	115989	99666	60941	101194	38913	38908	113670	97418	95221	95863	52491	41505	94783	96041	39615	121279	94387	94381	62810	96270	94780	52889	54721	91187	113517	94488	57374	51159	90427	44374	40974	90601	40950	49602	44978	40878	43346	116791	43298	117016	43262	43287	43302	43304	44959	44055	43271	43308
BEB112	116017	115933	99669	60870	101215	38904	38902	113707	97440	95240	95895	52591	41529	94820	96064	39626	121295	94395	94406	62718	96278	94825	52980	54849	91227	113512	94512	57332	51141	90455	44331	40985	90620	40994	49637	45076	40894	43288	116808	43272	117033	43240	43241	43282	43245	44981	44024	43231	43227
BEB137	122489	122333	16411	95210	18372	96437	96434	127858	6336	2940	3740	100876	94693	1824	4192	93984	118141	898	887	98802	3671	1190	93947	94814	86843	127840	1007	93292	100120	55943	91592	96083	56138	96082	94857	91943	96033	91516	136420	91481	136594	91520	91503	91470	91530	92542	91782	91460	91491
BEB139	108857	108768	107311	87185	108391	61757	61731	100580	101998	99954	100190	56583	56822	99398	100685	62992	122440	98855	98853	1889	100398	98800	78545	79809	84765	100690	98972	83583	55690	88229	72252	55079	88448	55012	76693	72532	54992	70448	104677	70384	104919	70397	70385	70498	70363	71611	71051	70457	70384
BEB140	114902	114821	87231	99759	86285	86289	86301	112849	90054	87680	88349	85892	85322	86656	88603	87322	118689	86622	86612	79835	88547	86955	96917	97935	14686	112745	86740	99497	84909	82779	93433	84789	82998	84785	97030	93889	84724	92355	116803	92322	117029	92333	92303	92291	92333	93432	92655	92294	92329
BEB143	115294	115192	87729	100145	86759	86835	86849	113341	90461	88246	88892	86362	86036	87252	88976	87906	119134	87197	87198	80465	88925	87521	97460	98424	15483	113194	87321	99972	85417	83386	93885	85508	83541	85502	97367	94331	85432	92817	117309	92791	117543	92802	92762	92780	92795	93877	93117	92775	92805
EN002	22489	22379	134716	130075	134977	113031	113021	1845	130274	128667	128990	108896	110886	128169	129297	113191	111197	127753	127763	100637	129043	127903	124845	125572	117042	1206	127846	126277	108239	118446	118006	110780	118624	110795	120873	118367	110778	116767	62590	116796	62856	116760	116758	116781	116733	117622	117199	116749	116770
EN007	118288	118266	91408	67648	92274	57892	57889	120666	90770	89521	89910	67391	60444	89087	89788	56501	120147	88951	88967	77943	90099	89189	61727	62681	99307	120505	88963	60652	66622	90693	62427	62231	90757	62233	65548	62846	62197	60155	131291	60127	131474	60144	60119	60294	60121	61203	60605	60225	60190
EN012	117046	116984	91029	66289	91936	56096	56086	118881	89410	88579	88395	63945	58648	88439	89100	54714	118845	88320	88330	76448	88770	87976	59751	59001	98709	119180	88332	58976	64551	89753	61146	60416	89866	60400	61915	61097	60419	58995	129644	58921	129825	58922	58917	59021	58922	58859	59385	58977	58966
EN018	117004	116961	98583	62224	100318	39798	39777	114497	96811	95085	95470	52629	42748	94792	95706	38145	122051	94034	94038	62451	95630	94263	53530	54869	93132	114311	94142	57022	51747	89054	42520	43261	89208	43249	47132	43036	43214	41647	118559	41622	118767	41587	41604	41723	41625	42986	42328	41682	41633
EN019	116513	116396	64766	94270	65143	89635	89658	118392	58587	55517	56613	90400	88828	55046	56711	88286	121634	54657	54662	86406	57086	55246	92448	93487	83427	118284	54778	93095	89350	6473	88980	90843	6876	90862	92794	89401	90795	87900	124392	87882	124504	87898	87888	87854	87929	89107	88592	87867	87903
EN020	116673	116535	64999	94597	65355	89934	89951	118223	58512	55938	56381	90283	89150	55460	56961	88568	121554	55074	55082	86758	56825	55207	92538	93394	83633	118356	55190	93253	89567	6956	89131	91044	7371	91097	92682	89404	91046	88056	124249	88036	124390	88055	88042	88013	88037	89109	88730	88022	88055
EN177	128057	127900	36317	95277	36148	104436	104438	134299	31423	29755	29909	109157	105281	29989	30561	101037	119957	30182	30203	110836	31249	29778	98321	98554	94269	134567	30306	94265	109061	65889	100896	106774	66036	106805	102330	100681	106776	100223	143578	100213	143749	100226	100203	100200	100237	100608	100479	100196	100214
EN178	110726	110601	134299	122766	135715	100077	100061	101611	125940	124514	124097	89762	91097	124549	125192	101447	127823	123948	123975	82244	124483	123397	112749	112742	105259	102254	124063	119942	89910	110923	108073	89551	111189	89533	109344	107977	89580	106978	96940	106960	97223	106975	106974	106989	106942	106838	107485	106950	106980
EN182	116396	116279	64657	94246	65035	89595	89614	118328	58518	55438	56545	90411	88736	54929	56647	88228	121758	54576	54576	86272	57004	55162	92412	93438	83463	118225	54695	93092	89360	6401	88892	90742	6820	90763	92707	89318	90701	87820	124412	87797	124517	87819	87802	87774	87847	89024	88504	87786	87819
EN184	116944	116814	64127	94910	65288	90042	90065	118025	58627	55975	56763	89852	88610	55451	56993	88695	121674	54608	54618	85991	56663	54864	92333	93213	84022	118070	54725	93077	89103	5966	89499	90569	6350	90547	92847	89740	90511	88414	124528	88396	124657	88422	88407	88393	88425	89367	89082	88391	88419
EN185	127107	127011	28269	95203	29359	98782	98783	133720	19340	16454	17408	104122	97630	14010	17605	96317	122103	15022	15000	103248	17550	15628	94678	95459		133608	15100	93445	103424	67053	94108	99146	67188	99130	96924	94482	99077	94019	142862	93981	142930	94028	94021	93975	94051	94917	94253	93968	93993
EN186	109853	109861	109725	89216	110528	64616	64603	103688	104792	102990	103365	63095	61353	102472	103316	66202	123406	101945	101959	10860	103298	102116	81279	82386	87730	103675	102072	82992	62184	88167	76129	59654	88323	59721	79831	76417	59687	74118	108133	74098	108332	74076	74063	74210	74048	74930	74742	74180	74110
EN188	116452	116403	100390	61833	101853	39535	39510	113293	97358	95970	95670	52178	42297	95752	96567	40058	120806	95342	95357	63845	96045	95119	53524	54370	91574	113681	95449	58018	51782	91079	44907	41828	91237	41826	48330	44835	41884	43991	116754	43969	117024	43934	43920	44089	43931	44553	44677	44048	44016
EN189	129277	129207	32439	97071	33875	99585	99590	136154	25533	23346	24057	105745	99017	22708	24155	96968	123466	22320	22312	106264	24232	22806	96742	97417	96127	136075	22414	95332	105147	70680	92307	100633	70779	100639	94941	92701	100573	92456	145289	92410	145343	92442	92437	92426	92449	93277	92686	92415	92420
EN191	116065	116007	109328	75771	110177	50273	50273	110024	104767	102667	103146	4726	44782	102630	103459	53149	126563	101881	101875	56101	103498	102097	66145	67509	89605	109924	101979	72975	2847	92068	60621	43103	92257	43159	65145	61209	43057	59451	108708	59464	108990	59492	59448	59541	59480	60773	60193	59502	59469
EN192	117169	117105	96941	69862	98396	40166	40171	118457	93990	92246	92625	60508	52114	91956	92908	37708	120959	91445	91449	72265	93010	91767	62911	64461	96787	118295	91554	65282	59398	90803	1570	52644	90961	52701	7724	2326	52613	9990	125442	10003	125612	9984	10011	10063	9993	11859	10709	10015	9985
EN209	130165	130066	22036	91869	17082	105758	105745	141513	36953	35337	35516	115983	111027	34474	35992	106359	118848	34070	34046	118056	35499	33969	101008	101399	92538	141637	34184	93767	115667	76782	104010	112794	76891	112815	105979	104058	112781	103701	153670	103663	153747	103698	103667	103665	103703	104245	103684	103656	103679
EN217	123685	123638	92958	12750	93496	60250	60224	126093	94945	93444	93473	73945	63047	93543	93982	58146	121676	93129	93128	83444	94169	93190	17275	19024	102787	126225	93133	843	73025	90818	64840	64461	90942	64513	68126	64643	64463	63547	134102	63499	134327	63523	63505	63490	63492	64615	63868	63466	63520
EN219	126090	126060	95752	56006	96186	59227	59233	124673	96136	94340	94822	65564	60258	94153	94934	58342	125629	94107	94117	78698	95485	94417	48947	50577	98679	124589	94235	54411	64450	94531	62315	60099	94673	60169	66449	62747	60127	60852	129084	60835	129104	60825	60860	60865	60869	62170	61233	60868	60857
EN221	123391	123293	55187	96657	56637	96776	96798	127273	50238	47890	48574	99656	96581	48470	48958	93901	120244	47919	47921	100920	50044	48469	95783	96496	88243	127167	47925	95880	98980	53911	94239	98068	54187	98018	97396	94743	97994	94282	135125	94262	135218	94279	94258	94250	94278	95280	94937	94242	94272
EN222	132141	132061	47247	96839	48348	105255	105257	137999	46208	46187	45679	111200	107044	45457	46757	101616	120806	45719	45727	114437	45632	45124	100496	99599	95104	138497	45820	97013	111958	74677	102945	108793	74799	108791	101247	102790	108847	103204	146583	103180	146660	103173	103152	103225	103188	102349	103147	103208	103230
EN235	123655	123608	92956	12630	93511	60225	60199	126252	94881	93365	93716	74038	63011	93462	93880	58126	121682	93050	93050	83339	94228	93168	17234	19117	102756	126216	93053	787	73018	90692	64824	64504	90827	64547	68098	64687	64500	63512	134233	63455	134409	63473	63508	63527	63443	64658	63832	63482	63484
EN237	124596	124629	94001	15345	94422	62407	62395	127210	95374	94567	94507	75375	65456	94747	94900	60245	122256	94341	94345	85756	94955	94157	19810	20787	103934	127469	94342	3540	75177	92007	66871	66864	92107	66845	68973	66259	66929	65516	135464	65505	135527	65479	65459	65638	65460	66094	65768	65589	65561
EN238	124138	124123	93512	14180	93998	61470	61427	126665	95081	94045	93946	74579	64398	94215	94415	59282	121954	93786	93797	84647	94449	93665	18556	19825	103433	126861	93798	2252	74191	91511	65945	65760	91605	65757	68251	65408	65831	64589	134736	64552	134886	64523	64556	64672	64512	65236	64840	64622	64588
EN239	125858	125701	30224	95465	30605	98444	98451	129594	21667	19587	19417	102583	97145	18206	20572	94697	119910	18336	18342	102349	19504	18000	94880	95260	87453	129902	18458	93142	102337	59277	94480	98553	59453	98567	96549	94243	98558	93989	137512	93963	137689	93987	93978	93961	93998	94554	94231	93940	93984
EN240	117432	117357	100846	65836	101120	728	711	112866	98375	96751	96792	51531	45642	96900	97362	10462	119817	96480	96473	61582	97557	96487	58066	59480	90166	113026	96571	60373	50550	89811	39725	45084	89978	45131	44377	40051	45116	38161	118818	38113	119145	38128	38141	38168	38154	39482	38856	38144	38141
EN241	114872	114794	87230	99777	86270	86282	86292	112851	90046	87702	88364	85852	85343	86662	88614	87319	118659	86658	86651	79835	88546	86979	96916	97934	14769	112725	86776	99505	84886	82798	93436	84804	83010	84803	96992	93876	84738	92363	116747	92319	116989	92328	92311	92305	92344	93407	92658	92309	92333
EN242	114243	114142	105762	75374	106895	49930	49909	106872	101432	99382	99767	23038	45186	99349	100107	52357	124750	98653	98637	53128	100220	98784	66577	68103	88460	106789	98748	72140	21710	90888	57854	43925	91071	43896	62529	58291	43878	57039	110030	57035	110311	57048	57026	57060	57053	58402	57666	57047	57048
EN243	117685	117583	101337	67039	101593	3060	3054	113252	98615	97243	97145	52022	46811	97385	97920	11986	120172	97026	97032	62523	97760	96869	59187	60129	90955	113546	97136	61392	51497	90537	40721	46205	90717	46285	43536	40934	46201	39196	119184	39106	119482	39152	39150	39133	39099	39731	39847	39133	39124
EN248	108905	108750	106939	86831	108078	61137	61163	100823	102084	99495	100121	56896	56107	98905	100426	62556	122593	98363	98357	1194	100540	98675	78428	80149	84349	100637	98485	83307	55252	87714	71728	54436	87970	54434	77073	72420	54291	69995	104728	69947	105021	70026	69986	69835	70033	71706	70728	69864	69955
EN254	122764	122641	17726	95140	19677	96483	96495	128719	3877	99	1349	101308	95307	3158	1552	94102	117953	2682	2679	99696	5535	3370	94208	95094	87809	128639	2805	93339	100577	56500	92180	97025	56690	97046	95171	92572	96995	92200	137058	92181	137144	92210	92195	92168	92239	93113	92475	92160	92187
EN255	23168	23082	135582	130533	135687	113416	113396	2899	130670	129484	129386	109257	111421	128971	129972	113606	111240	128624	128635	101293	129390	128360	125020	125490	117650	3028	128706	126666	108942	119161	118632	111205	119332	111139	120922	118669	111212	117370	62434	117390	62761	117384	117334	117446	117335	117964	117771	117413	117390
EN260	114710	114607	89468	100285	88598	86447	86446	113664	92035	89796	90451	85380	84948	88324	90635	88437	119212	88309	88298	78503	90270	88651	98033	99164	25921	113488	88431	100644	84295	82857	93994	83931	83065	83942	97636	94480	83869	92914	116896	92873	117160	92893	92863	92859	92902	93920	92951	92859	92885
EN274	108737	108707	107121	86889	108222	61454	61441	100828	102223	99717	100319	56868	56383	99130	100590	62701	122580	98588	98600	1008	100632	98922	78509	80093	84459	100630	98717	83395	55452	87905	71955	54629	88124	54679	76868	72550	54561	70154	104712	70085	104944	70086	70096	70185	70111	71602	70756	70161	70108
EN276	109158	109042	107721	87708	108749	62151	62081	100557	101977	100239	100146	56380	57187	99841	101000	63352	122516	99305	99295	2495	100364	98948	78733	79452	85153	101009	99404	84025	56134	88665	72645	55390	88923	55323	76339	72504	55352	70930	104810	70869	105081	70857	70803	70908	70862	71674	71515	70881	70849
EN277	107170	107223	120393	125845	118456	119189	119205	108508	118002	116842	116896	125056	120754	117125	117299	118964	19432	117388	117398	121275	118263	117417	123866	124239	120939	108339	117479	121296	124647	120833	120122	121130	120941	121146	121919	120295	121153	120239	117263	120249	117481	120235	120220	120262	120185	120712	120434	120260	120226
EN313	123225	123099	17471	95661	19451	97186	97198	128880	7847	4369	5519	101870	95485	3135	5418	94756	118853	1854	1872	99820	4596	2656	94734	95628	87697	128700	1978	93779	101040	56894	92282	96956	56989	96952	95514	92693	96881	92163	137679	92136	137793	92170	92149	92148	92190	93194	92435	92137	92158
Reference	122264	122153	16765	94739	18755	96347	96355	127760	7398	3617	4805	100934	94129	2279	5107	93782	118581	1498	1472	98386	4654	2225	93928	94849	87196	127574	1594	92840	100100	55527	91824	95773	55733	95751	95208	92235	95696	91639	136314	91604	136414	91657	91649	91576	91668	92704	91932	91586	91624
[truncated: 92 more columns]
